# Supplementary material
Source: PubMed Central journal article supplement (PMC2875872)
Supplement: NIHMS184326-supplement-01.pdf [file NIHMS184326-supplement-01.pdf]

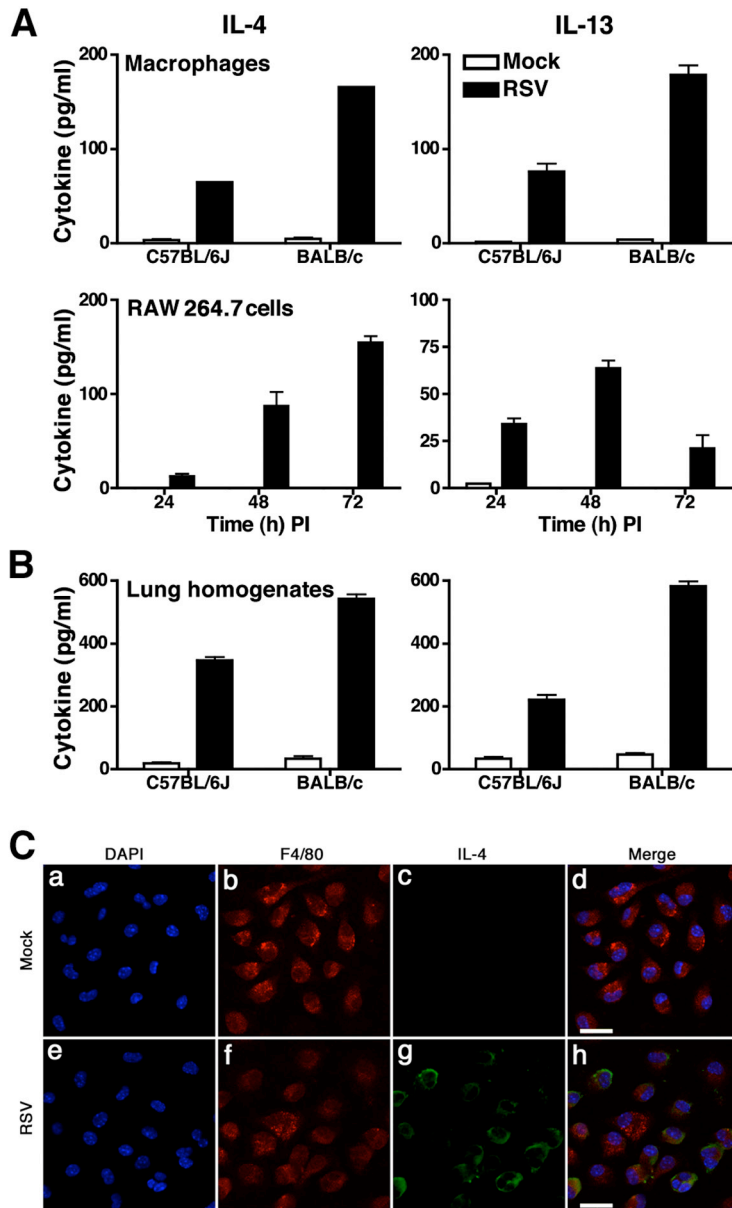

**Supplemental Fig. S1.** RSV induces macrophage-derived IL-4 and IL-13. (A) Peritoneal macrophages from WT C57BL/6J or BALB/cByJ mice were treated with medium only or infected with RSV (MOI = 2) for 48 h. Supernatants were collected and analyzed for IL-4 and IL-13 secretion by ELISA. RAW 264.7 cells were similarly treated. Supernatants were collected at the indicated times and analyzed by ELISA for the secretion of IL-4 and IL-13. (B) WT C57BL/6J and BALB/cByJ mice were treated i.n. with PBS (mock) or

infected with RSV ( $10^6$  pfu/animal). Lungs were harvested at 4 d p.i. and IL-4 and IL-13 protein levels were measured by ELISA from lung homogenates. Data represents the mean  $\pm$  SEM of 3 independent experiments. (C) WT C57BL/6 mice were mock- or RSV-infected as described. BAL cells were collected 4 d p.i., cultured for 2 h, fixed, and stained for DAPI (a nuclear marker; blue), F4/80 (a macrophage marker; red), and IL-4 (green), then viewed by confocal microscopy. Bar represents 20  $\mu$ m.

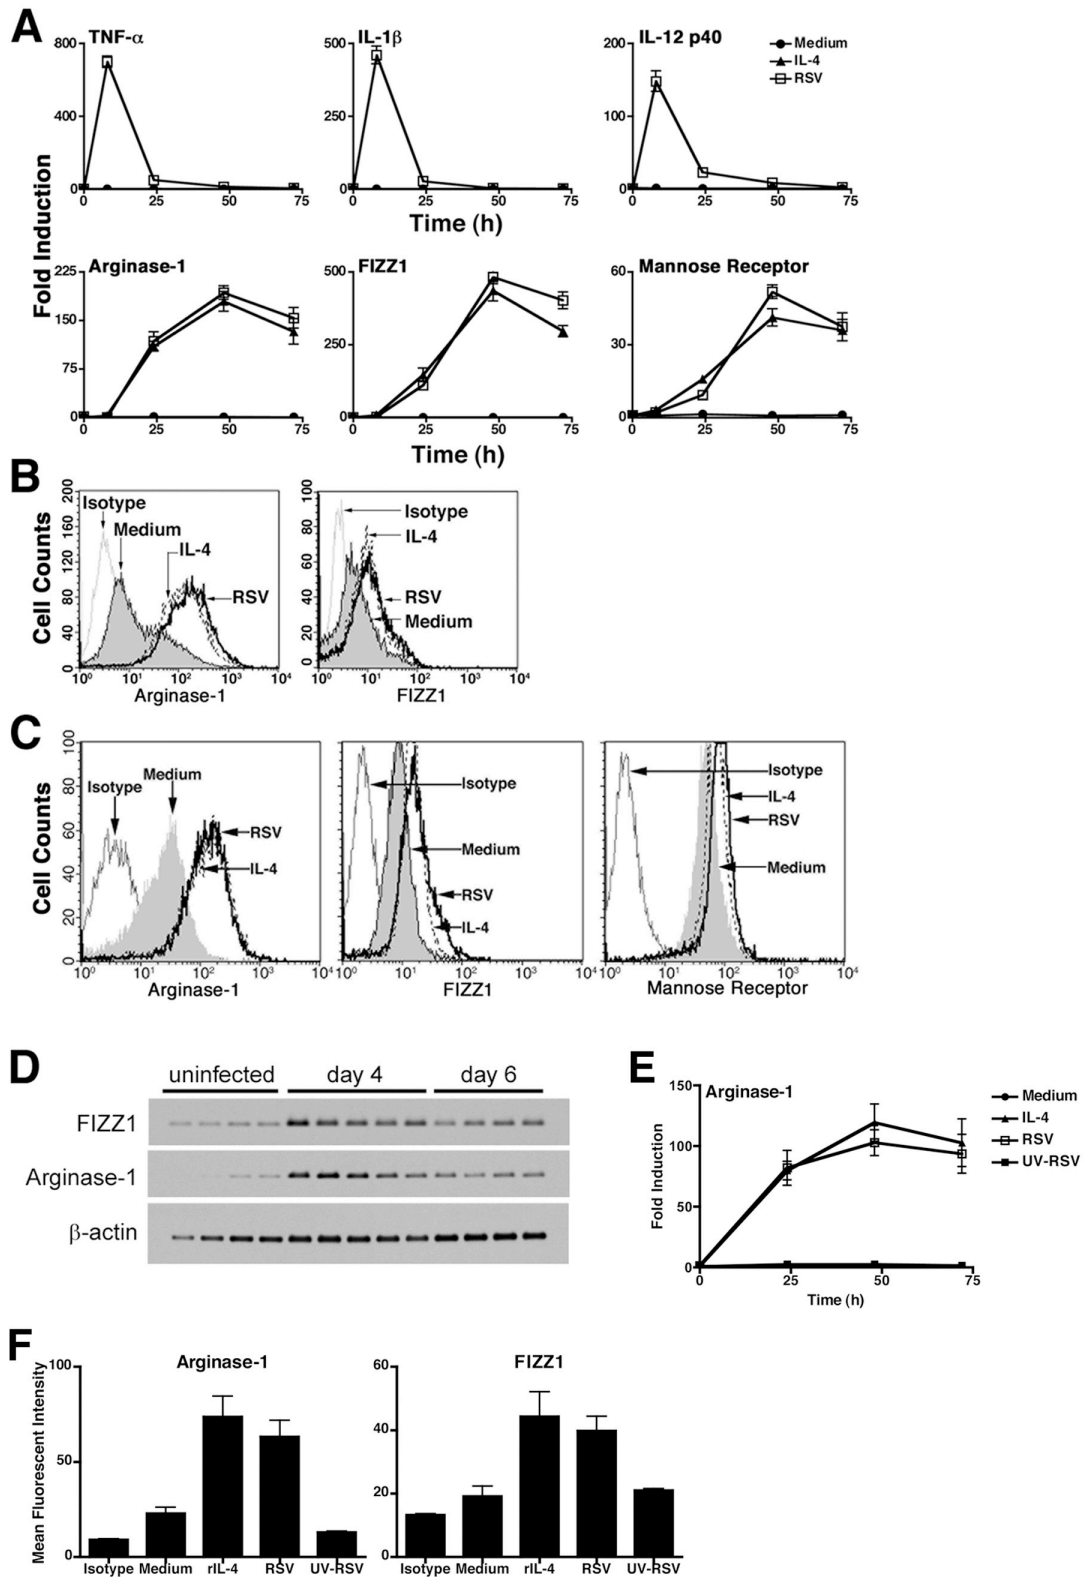

**Supplemental Fig. S2.** RSV infection induces differentiation of AA-M $\phi$ . (A) WT C57BL/6 peritoneal macrophages were treated with medium alone, rIL-4, or RSV. Expression of genes associated with CA-M $\phi$  and AA-M $\phi$  were analyzed by quantitative real-time PCR. Data are presented as means  $\pm$  SEM and are derived from a single representative experiment (N = 4). (B) WT C57BL/6 macrophages were treated as in (A) for 48 h. Arginase-1 and FIZZ1 protein was analyzed by FACS. Data are from a single representative experiment (N = 4). Arrows indicate isotype control (gray line), medium (gray histogram), rIL-4 (dashed line), and RSV (black line). (C) Cotton rat peritoneal macrophages were treated as in (B) and analyzed for arginase-1, FIZZ1, and MR by FACS. Arrow indications are as described in (B). (D) Cotton rats were mock- or RSV-infected ( $10^6$  pfu/animal). BALs were harvested 4 d and 6 d p.i. and analyzed for gene expression by RT-PCR and Southern blotting. (E) WT C57BL/6 macrophages were treated with medium alone, rIL-4, or infected with viable RSV or UV-inactivated RSV. mRNA gene expression of arginase-1 was analyzed by real time PCR. (F) WT C57BL/6 macrophages were treated as in (E) for 48 h. Arginase-1 and FIZZ1 protein was analyzed by FACS by staining with either isotype control IgG or anti-arginase-1 or anti-FIZZ1 antibodies.

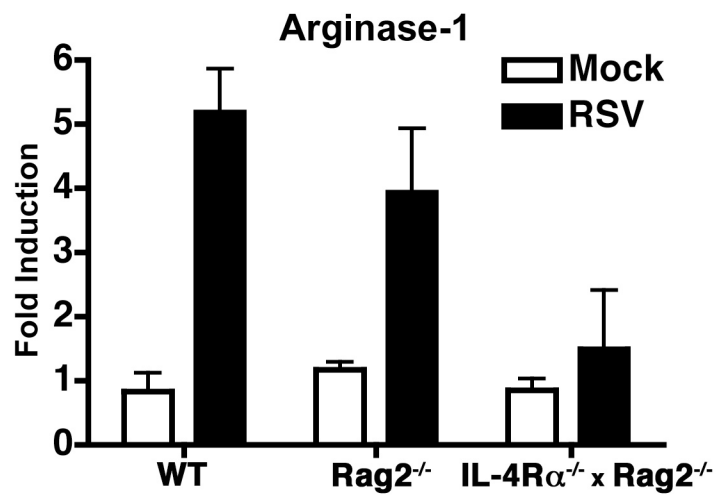

**Supplemental Fig. S3.** RSV-induced AA-Mφ induction in B and T cell-deficient Rag2<sup>-/-</sup> mice. WT BALB/c, Rag2<sup>-/-</sup>, and IL-4Rα<sup>-/-</sup> x Rag2<sup>-/-</sup> mice were treated i.n. with PBS (mock-) or RSV (10<sup>6</sup> pfu/animal)-infected. Lungs were harvested at 4 d p.i. and analyzed for arginase-1 mRNA by real time PCR.

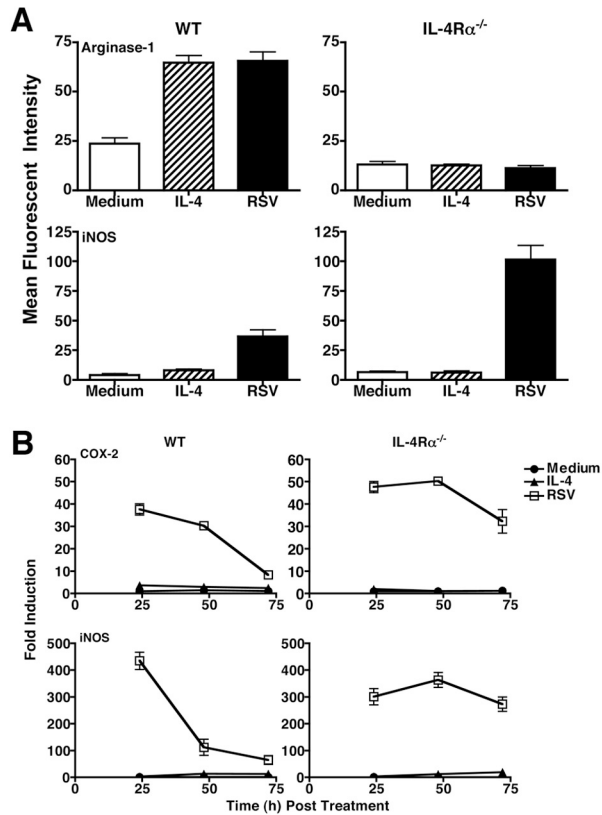

**Supplemental Fig. S4.** Failure to induce AA-Mφ prolongs CA-Mφ phenotype. (A) WT BALB/c and IL-4Rα<sup>-/-</sup> peritoneal macrophages were treated as previously described. After 48 h, cells were analyzed by FACS for arginase-1 (R&D, Inc.) and iNOS (BD Biosciences). Treatments were performed in triplicate and data are presented as a single representative experiment (N = 3). (B). WT BALB/c and IL-4Rα<sup>-/-</sup> macrophages were treated as previously described and harvested at the indicated times. Expression of COX-2 (top graphs) and iNOS (bottom graphs) were analyzed by real-time PCR. Data are presented as means ± SEM and are derived from a single representative experiment (N = 3).

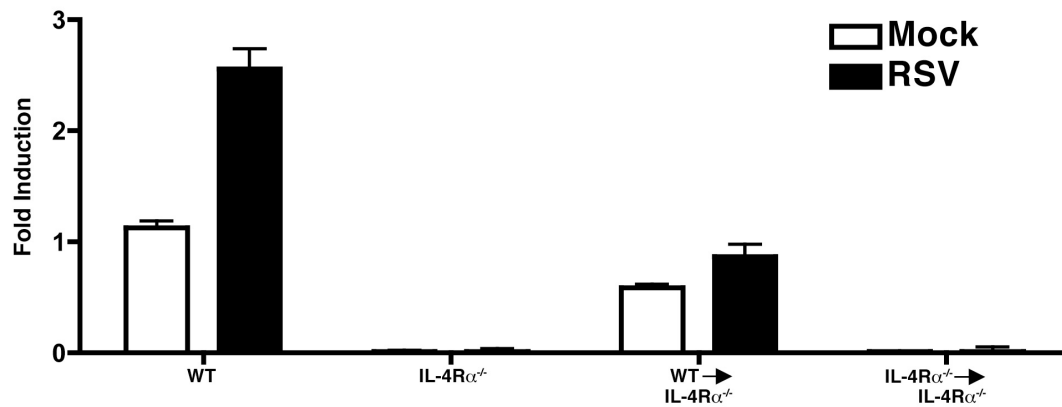

**Supplemental Fig. S5.** IL-4R $\alpha$  expression in lungs of IL-4R $\alpha$ <sup>-/-</sup> mice adoptively transferred with WT macrophages. BALB/c WT and IL-4R $\alpha$ <sup>-/-</sup> mice, as well as IL-4R $\alpha$ <sup>-/-</sup> mice that received either 1.5 x 10<sup>7</sup> WT or IL-4R $\alpha$ <sup>-/-</sup> macrophages by i.p., were mock- or RSV-infected 5 d later. Lungs were harvested 4 d p.i. and analyzed for IL-4R $\alpha$  gene expression by real-time PCR.

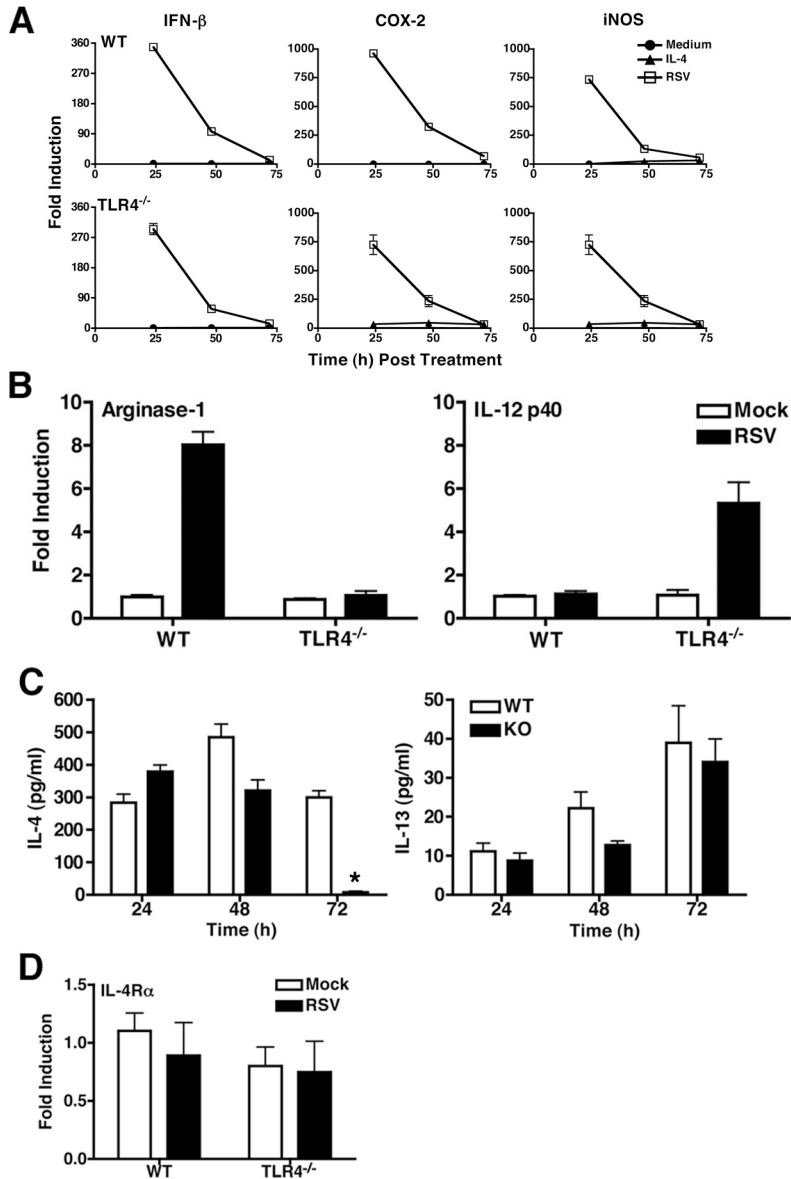

**Supplemental Fig. S6.** Effect of TLR4 deficiency on RSV-induced cytokine expression.

(A) WT C57BL/6 and TLR4<sup>-/-</sup> peritoneal macrophages were treated with medium, rIL-4, or infected with RSV for up to 72 h and analyzed for IFN- $\beta$ , COX-2, and iNOS mRNA by real-time PCR. \* $p < 0.05$  (B) WT and TLR4<sup>-/-</sup> mice were mock- or RSV-infected. Lungs were harvested 4 d p.i. and arginase-1 and IL-12 p40 mRNA measured by real-time PCR. (C) WT C57BL/6 and TLR4<sup>-/-</sup> macrophages were treated as indicated and



analyzed for IL-4 and IL-13 protein secretion by ELISA (N = 3). (D) WT and TLR4<sup>-/-</sup> mice were mock- or RSV-infected. Lungs were harvested 4 d p.i. and IL-4R $\alpha$  mRNA measured by real-time PCR.

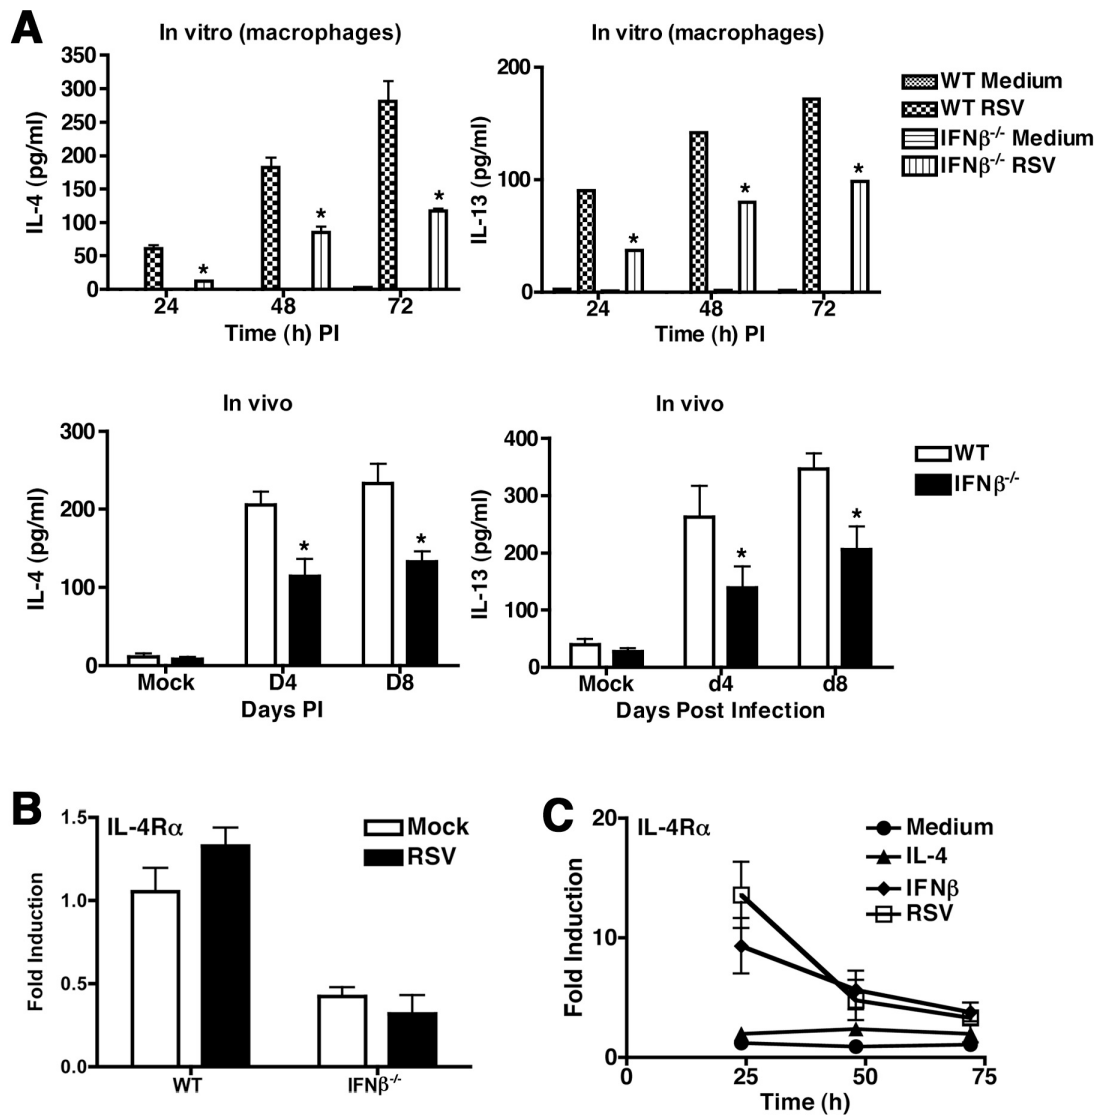

**Supplemental Fig. S7. Effect of IFN- $\beta$  deficiency on IL-4 and IL-4R $\alpha$  mRNA**

expression in vitro and in vivo. (A) Top graphs: Peritoneal macrophages from WT C57BL/6J or IFN- $\beta^{-/-}$  mice were treated with medium only or infected with RSV for up to 72 h. (A; bottom graphs). WT and IFN- $\beta^{-/-}$  mice were mock- or RSV-infected. Lungs were harvested 4 d and 8 d p.i. and homogenized. Supernatants were collected and analyzed for IL-4 and IL-13 protein by ELISA. (B) WT C57BL/6J and IFN- $\beta^{-/-}$  mice

were mock- or RSV-infected. Lungs were harvested 4 d p.i. and analyzed for IL-4R $\alpha$  mRNA by real-time PCR. Data represents the mean  $\pm$  SEM of 3 independent experiments. (C) WT C57BL/6 peritoneal macrophages were treated with medium, rIL-4 (40 ng/ml), IFN- $\beta$  (100 U/ml), or infected with RSV (MOI = 2) and analyzed for mRNA gene expression by real-time PCR (N = 2).

## SUPPLEMENTAL METHODS

### **Harvest and culture of BAL and peritoneal thioglycollate-elicited peritoneal macrophages.**

BAL cells were obtained from 6-8 week old mice. Mice were sacrificed and the thoracic cavity opened to expose the lungs. After cannulating the trachea, the lungs were instilled with 1 ml of warmed RPMI 5 times and the lavages pooled. Cells were centrifuged and washed with saline before re-suspension in RPMI supplemented with 2% FCS, 1% penicillin/streptomycin, and 1% L-glutamate and incubated for 2 h at 37° C. Cells were washed with PBS to remove non-adherent or loosely adherent cells and re-cultured in fresh RPMI. Two more additional washes were carried out after 2 h and the cells were incubated overnight in fresh RPMI at 37° C. FACS analysis was performed on a sample of cells to assess the purity of the cells by staining for F4/80, a macrophage cell marker.

For peritoneal macrophages, 6-8 week old mice were injected with 2.5 ml of thioglycollate medium (Remel) i.p. Four d later, mice were sacrificed and peritoneal exudate cells were obtained by lavage and pooled. Cells were cultured and analyzed as described for BALs.

### **Cotton rat primer sequences:**

Cotton rat IL-13 (S): 5'-AGTCTTCAGTTTAAGCCAGCTTAC-3'

Cotton rat IL-13 (AS): 5'-TTTTCAATGGAAGGTACCACAGCGG-3'

Cotton rat arginase-1 (S): 5'-AGCATCTCTGGCCAYGCCAG-3'

Cotton rat arginase-1 (AS): 5'-ATTKCTTCTGTGRATGTAGA-3'

Cotton rat Mannose receptor (S): 5'-GTGAATTTTCAGAAATGGGAGTG-3'

Cotton rat Mannose receptor (AS): 5'-GTACCACTTGTTTTCAAACCTTG-3'.

### **Flow cytometry analysis**

Macrophages from mice or cotton rats were treated with medium alone, rIL-4, or infected with RSV for 48 h. Cells were harvested, washed with PBS, and then fixed with 4% PFA in 0.1 M phosphate buffer (PB) for staining of FIZZ1, arginase-1, mannose receptor, or iNOS as described (Shirey et al., 2008).

### **BAL macrophage intracellular staining**

Detection of IL-4 and arginase-1-positive macrophages in the lung was performed at day 4 p.i. ( $\geq 4$  mice/treatment). Mice were anesthetized with isoflurane and treated i.n with 50  $\mu$ l PBS (mock) or RSV ( $10^6$  pfu/animal). On day 4 p.i., mice were sacrificed, and BAL harvested. Cells were cultured in 2-well chamber slides for 2 h at 37° C, 5% CO<sub>2</sub>, washed with PBS, fixed with 4% PFA, and analyzed by confocal microscopy for expression of IL-4. Fixed BAL macrophages from mock- or RSV-infected mice were incubated for 30 min with PBST at RT. F4/80, a macrophage marker, was visualized by immunofluorescence using rat MAb antibody against mouse F4/80 (Ab Cam), followed by Cy3-conjugated donkey anti-rat IgG. IL-4 was detected using anti-mouse MAb against mouse IL-4 (R&D, Inc.), followed by secondary and tertiary staining with biotin-conjugated donkey anti-mouse IgG and Cy2-conjugated streptavidin. Nucleic acid was labeled using DAPI stain.
